# Supplementary material for: Genome-wide association analyses of invasive pneumococcal isolates identify a missense bacterial mutation associated with meningitis
Source: PubMed Central journal article supplement (PMC6331587; doi:10.1038/s41467-018-07997-y), 2019-01-14
Supplement: 41467_2018_7997_MOESM1_ESM.pdf [file 41467_2018_7997_MOESM1_ESM.pdf]

## **Supplementary Information**

Genome-Wide Association Analyses of Invasive Pneumococcal Isolates Identify a Missense Bacterial Mutation Associated with Meningitis

Li et al

Supplementary Figure 1

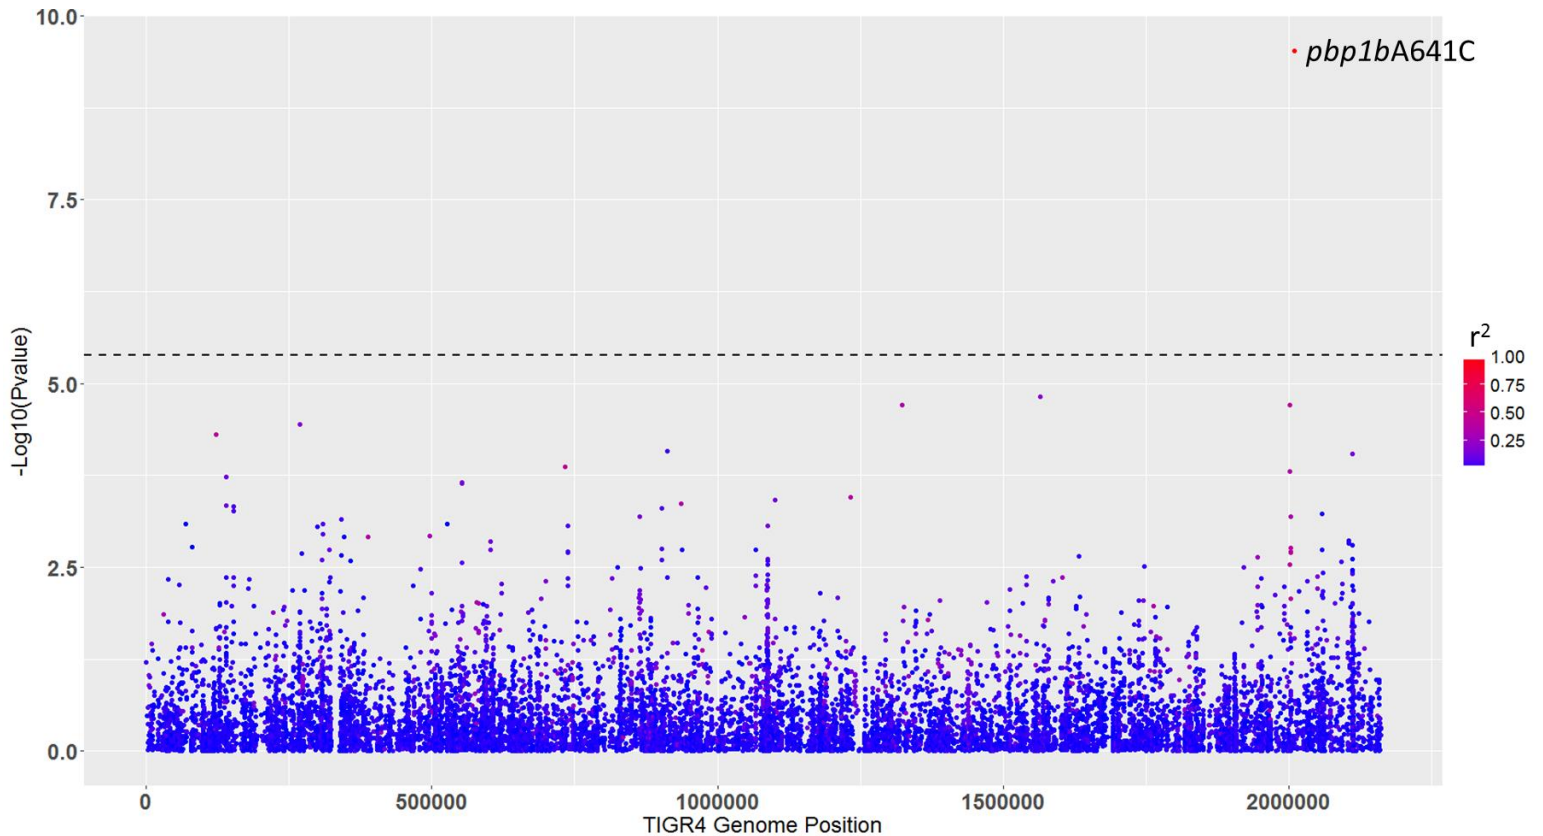

Supplementary Figure 1. Association between pneumococcal genome-wide non-synonymous SNPs and meningitis in the combined dataset (n=4572). P-values ( $-\log_{10}$  transformed) of all 12,096 non-synonymous SNPs assessed by a linear mixed-effects model (LMM) controlling for population structure are shown. Dashed line indicates the threshold for Bonferroni corrected  $p < 0.05$ . SNPs are colored according to their linkage disequilibrium ( $r^2$  value) with the lead variant, *pbp1bA641C* (TIGR4 T2008526G).

Supplementary Figure 2

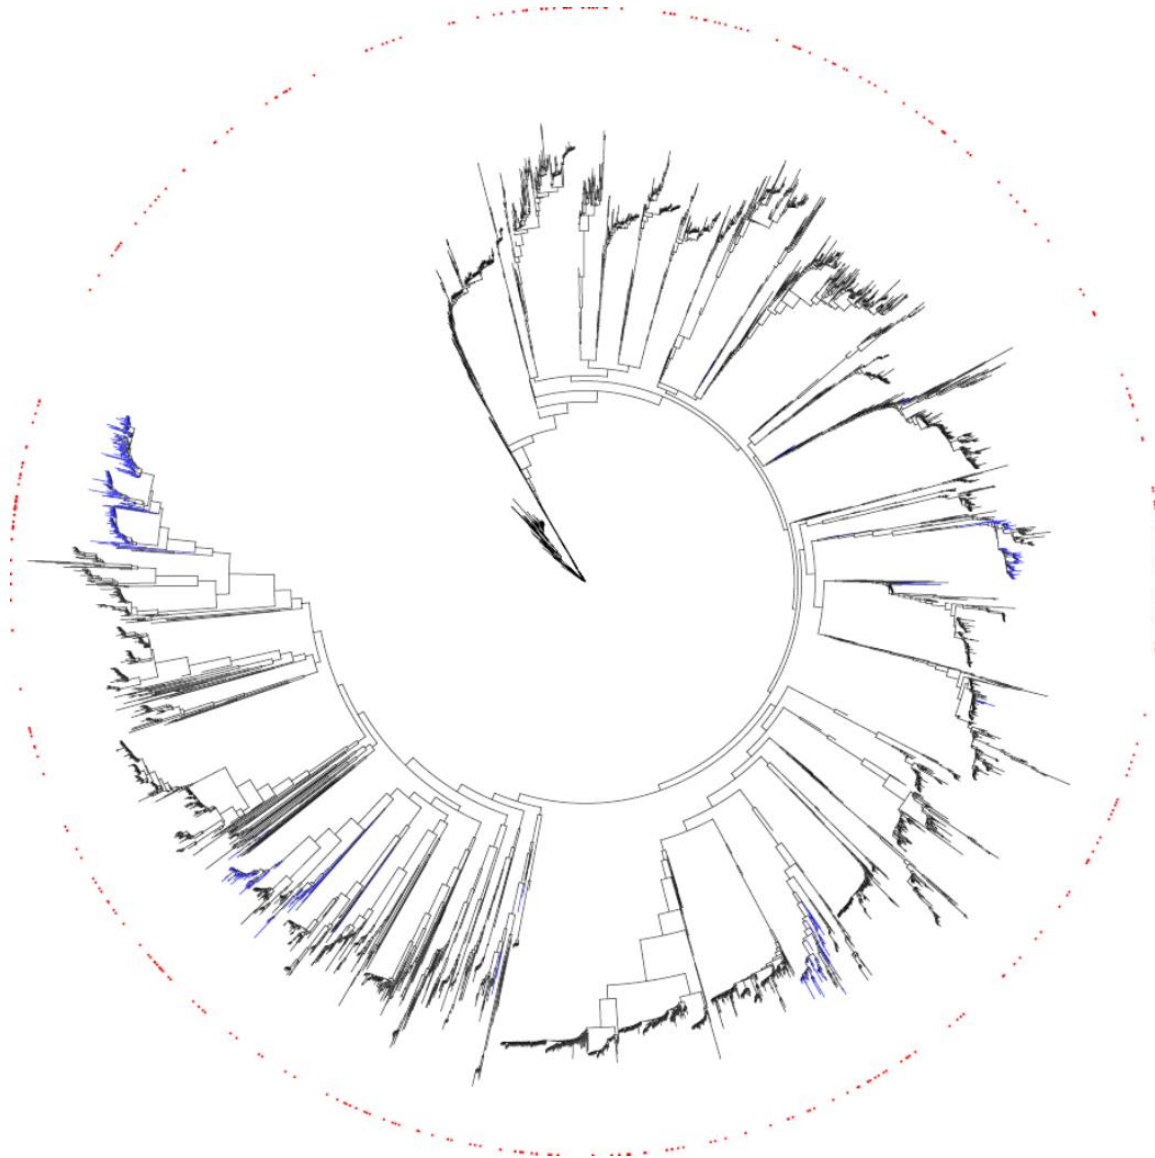

Supplementary Figure 2. A maximum-likelihood phylogenetic tree of the combined dataset isolates (n=4572) based on 57,765 genome-wide SNPs. Blue branch tips indicate isolates with the *pbp1b641C* genotype. Red dots in the outside circle indicate isolates from meningitis patients.

Supplementary Figure 3

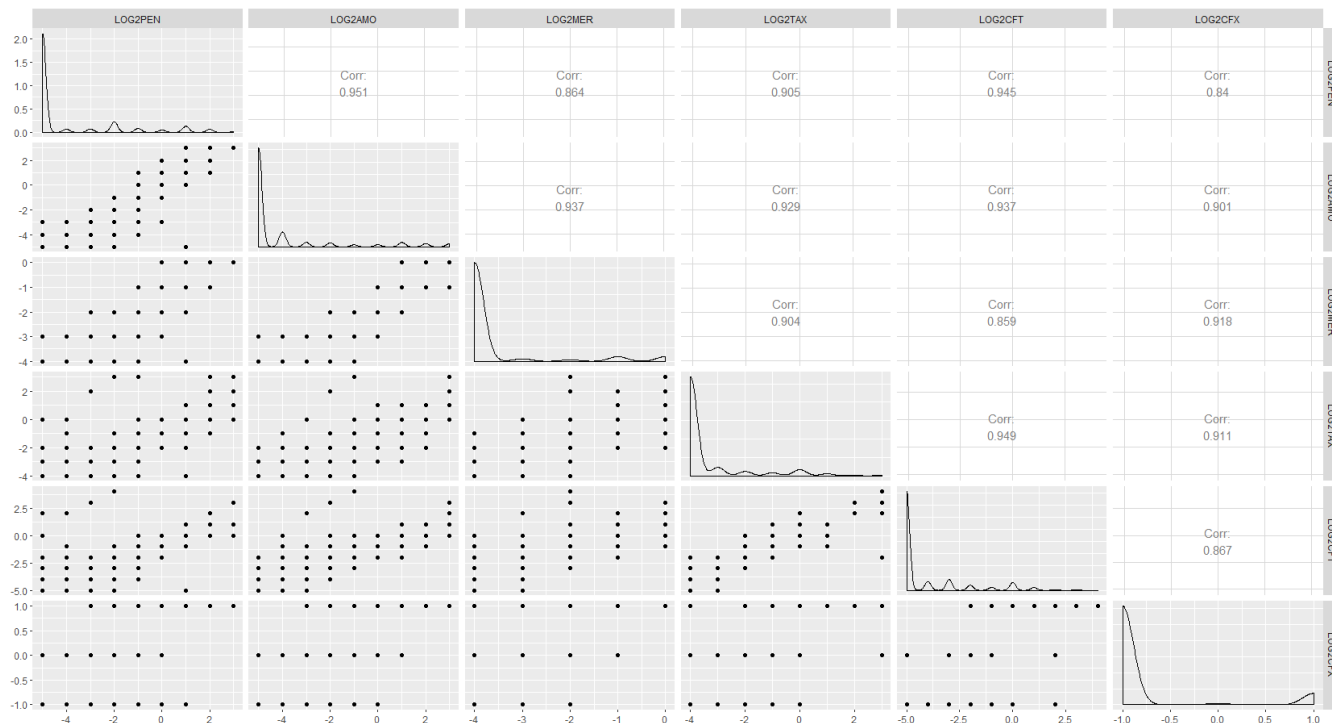

Supplementary Figure 3. Pair-wise scatter plot of log2 transformed MIC for six  $\beta$ -lactam antibiotics.

### Supplementary Figure 4

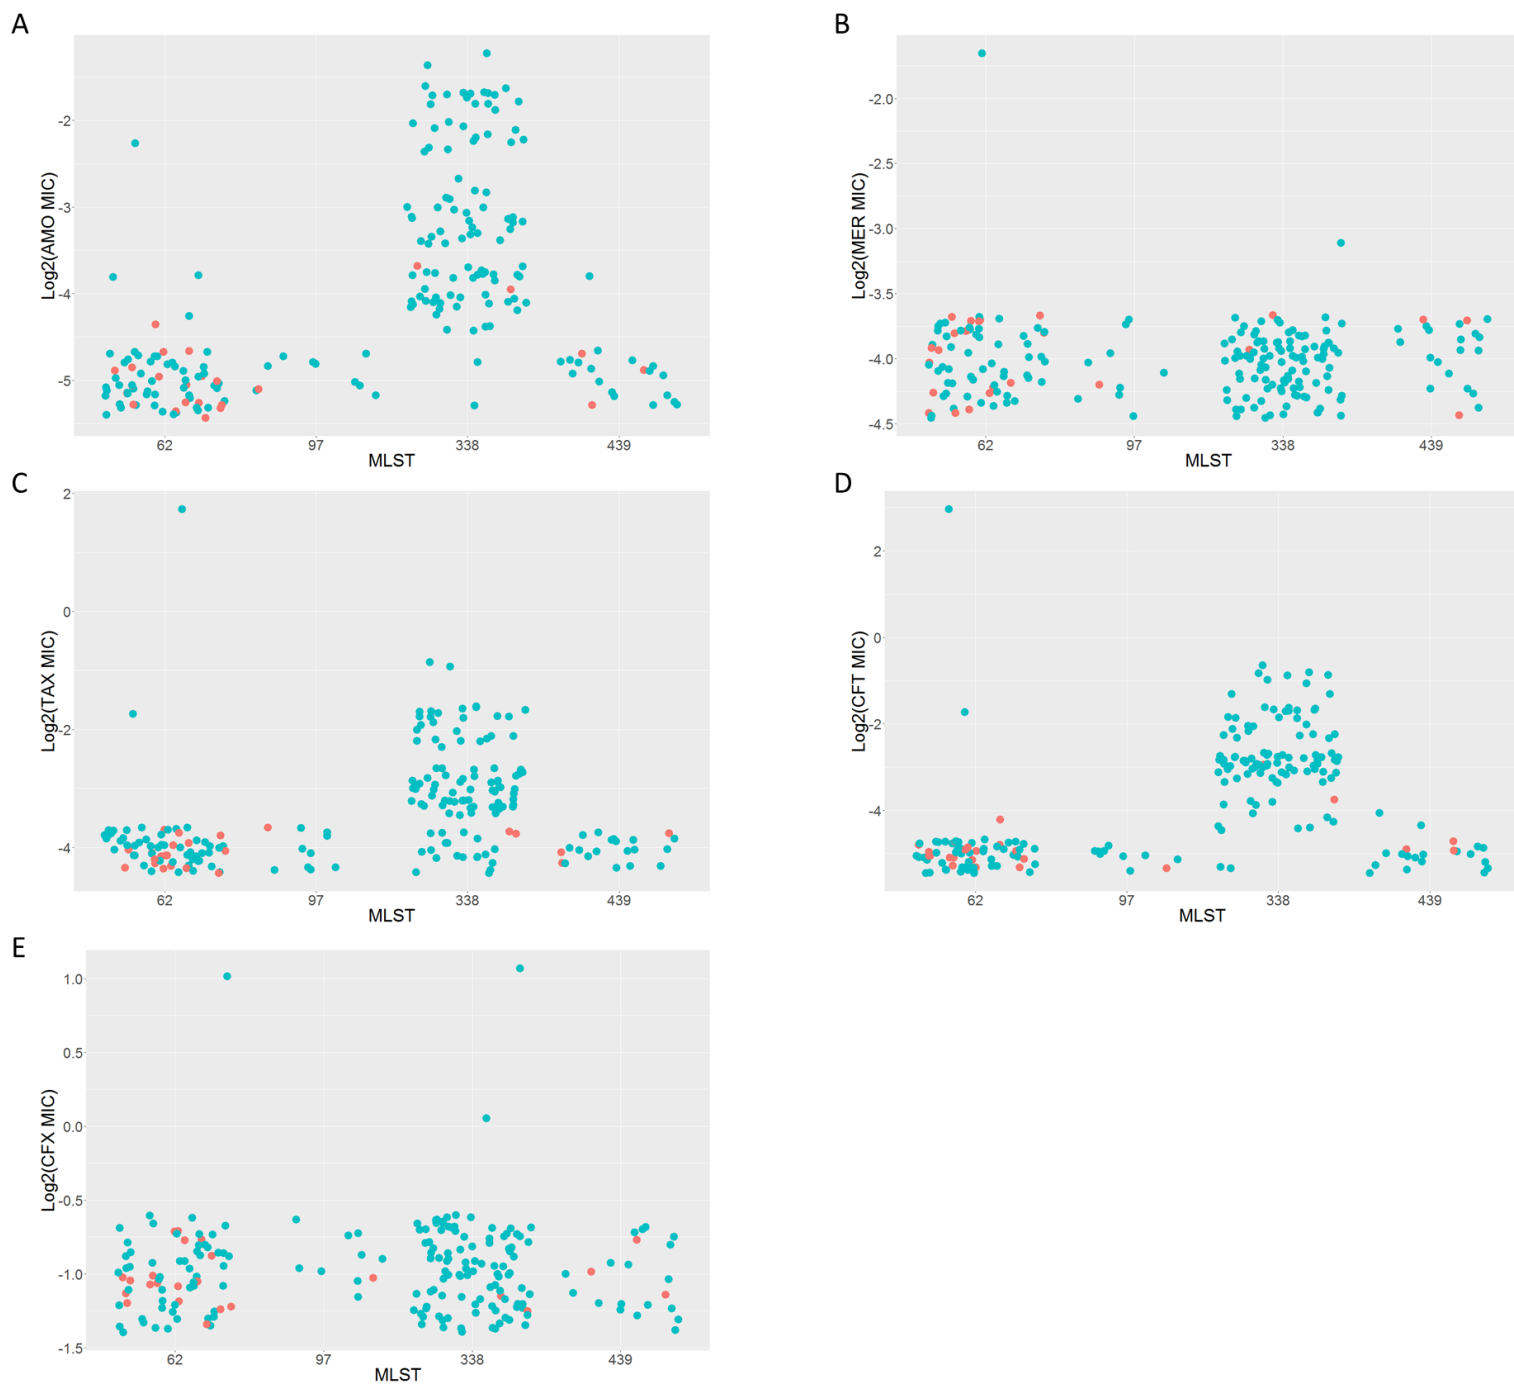

Supplementary Figure 4. Comparison of minimum inhibitory concentration (MIC) distribution between the non-*pbp1b641C* isolates (red) and *pbp1b641C* isolates (green) within the same multilocus sequence type (MLST). MIC (log<sub>2</sub> transformed) distributions of five antibiotics are shown: Amoxicillin (A), Meropenem (B), Cefotaxime (C), Ceftriaxone (D), and Cefuroxime (E). Only the top four MLSTs containing both *pbp1b641C* and non-*pbp1b641C* isolates are included.

## Supplementary Figure 5

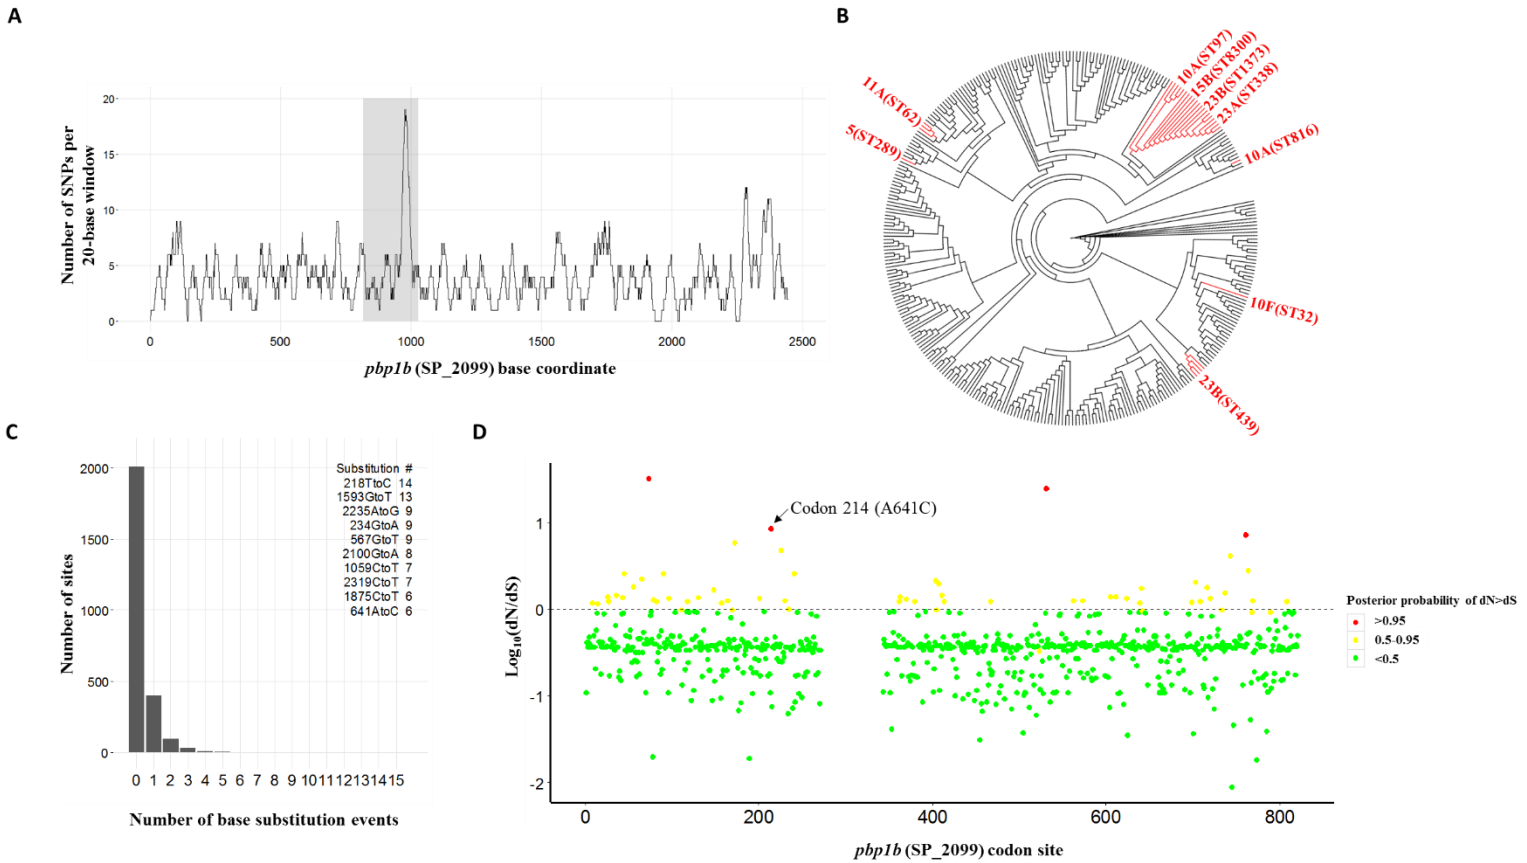

Supplementary Figure 5. Evidence of the *pbp1b*641 A to C substitution associating with selection advantage. (A) Density of single nucleotide polymorphism (SNP) within the *pbp1b* gene based on an alignment of 326 unique *pbp1b* sequences, of which 309 were from the two study cohorts and 17 were reference sequences. Number of SNPs within each 20-base sliding window is shown. Grey area indicates the region potentially affected by horizontal transfer, which was identified by the Gubbins software. (B) A cladogram of the 326 *pbp1b* gene sequences. Clades of *pbp1b* gene containing the 641C genotype are shown in red. Text labels indicate the representative serotype (MLST) found within each 641C-containing clade. (C) A histogram of the number of substitution event(s) at each base inferred from the phylogenetic analysis in (A). No substitution was observed for 2001 of the 2466 bases in the *pbp1b* reference sequence (SP\_2099), while six independent A to C changes at position 641 were inferred, corresponding to the 6 red clades in (B). (D) Detection of site-specific pervasive diversifying positive selection using the partition alignment. The ratio between non-synonymous substitution rate (dN) and synonymous substitution rate (dS) was estimated by a fast, unconstrained Bayesian approximation method. The estimated dN/dS ratio ( $\log_{10}$  transformed) is shown for each codon site. Dots are colored according to the posterior probabilities of dN/dS>1. Codon 273-343 were excluded from the analysis because they were within the region potentially affected by horizontal transfer.

Supplementary Figure 6

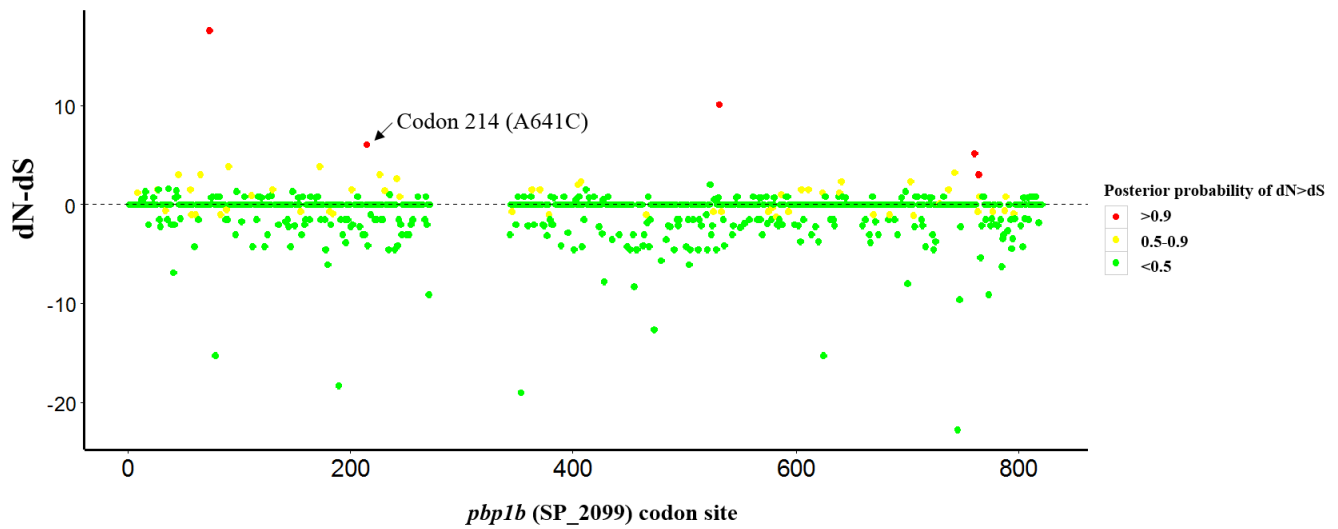

Supplementary Figure 6. Detection of site-specific diversifying positive selection using Mixed Effects Model of Evolution (MEME). The difference between non-synonymous substitution rate (dN) and synonymous substitution rate (dS) was estimated by the MEME method implemented in the HyPhy package. The estimated dN-dS is shown for each codon site. Dots are colored according to the posterior probabilities of dN>dS. Codon 273-343 were excluded from the analysis because they were within the region potentially affected by horizontal transfer.

## Supplementary Tables

**Supplementary Table 1.** Association between candidate variant and increased Amoxicillin (AMO) MIC

| Phenotype <sup>a</sup> | SNP <sup>b</sup> | Gene  | AA change | Coefficient <sup>c</sup> | SE <sup>d</sup> | p-value               |
|------------------------|------------------|-------|-----------|--------------------------|-----------------|-----------------------|
| AMO MIC                | T2008526G        | pbp1b | N214T     | -0.021                   | 0.052           | 0.68                  |
| AMO MIC                | A307891G         | pbp2x | T338A     | 0.21                     | 0.032           | 7.9×10 <sup>-11</sup> |
| AMO MIC                | A308029G         | pbp2x | R384G     | 0.14                     | 0.030           | 8.4×10 <sup>-7</sup>  |
| AMO MIC                | C308515G         | pbp2x | L546V     | 0.38                     | 0.041           | 8.3×10 <sup>-21</sup> |

a. Log<sub>2</sub> transformed MIC (μg ml<sup>-1</sup>) of the indicated beta-lactam antibiotic

b. Relative to reference TIGR4 genome. First letter is the reference allele

c. Increase in log<sub>2</sub>(MIC) associated with the alternative allele compared to the reference allele, after controlling for population structure

d. Standard error of the coefficient



**Supplementary Table 2.** Association between candidate variant and increased Meropenem (MER) MIC

| Phenotype <sup>a</sup> | SNP <sup>b</sup> | Gene  | AA change | Coefficient <sup>c</sup> | SE <sup>d</sup> | p-value               |
|------------------------|------------------|-------|-----------|--------------------------|-----------------|-----------------------|
| MER MIC                | T2008526G        | pbp1b | N214T     | -0.028                   | 0.027           | 0.30                  |
| MER MIC                | A307891G         | pbp2x | T338A     | 0.040                    | 0.017           | 0.016                 |
| MER MIC                | A308029G         | pbp2x | R384G     | 0.045                    | 0.015           | 0.0031                |
| MER MIC                | C308515G         | pbp2x | L546V     | 0.15                     | 0.022           | 1.1×10 <sup>-11</sup> |

a. Log<sub>2</sub> transformed MIC (μg ml<sup>-1</sup>) of the indicated beta-lactam antibiotic

b. Relative to reference TIGR4 genome. First letter is the reference allele

c. Increase in log<sub>2</sub>(MIC) associated with the alternative allele compared to the reference allele, after controlling for population structure

d. Standard error of the coefficient

**Supplementary Table 3.** Association between candidate variant and increased Cefotaxime (TAX) MIC

| Phenotype <sup>a</sup> | SNP <sup>b</sup> | Gene  | AA change | Coefficient <sup>c</sup> | SE <sup>d</sup> | p-value               |
|------------------------|------------------|-------|-----------|--------------------------|-----------------|-----------------------|
| TAX MIC                | T2008526G        | pbp1b | N214T     | -0.025                   | 0.043           | 0.56                  |
| TAX MIC                | A307891G         | pbp2x | T338A     | 0.033                    | 0.025           | 0.18                  |
| TAX MIC                | A308029G         | pbp2x | R384G     | -0.0085                  | 0.023           | 0.72                  |
| TAX MIC                | C308515G         | pbp2x | L546V     | 0.27                     | 0.033           | 2.1×10 <sup>-15</sup> |

a. Log<sub>2</sub> transformed MIC (μg ml<sup>-1</sup>) of the indicated beta-lactam antibiotic

b. Relative to reference TIGR4 genome. First letter is the reference allele

c. Increase in log<sub>2</sub>(MIC) associated with the alternative allele compared to the reference allele, after controlling for population structure

d. Standard error of the coefficient

**Supplementary Table 4.** Association between candidate variant and increased Ceftriaxone (CFT) MIC

| Phenotype <sup>a</sup> | SNP <sup>b</sup> | Gene  | AA change | Coefficient <sup>c</sup> | SE <sup>d</sup> | p-value               |
|------------------------|------------------|-------|-----------|--------------------------|-----------------|-----------------------|
| CFT MIC                | T2008526G        | pbp1b | N214T     | -0.0018                  | 0.053           | 0.97                  |
| CFT MIC                | A307891G         | pbp2x | T338A     | 0.14                     | 0.031           | 8.1×10 <sup>-6</sup>  |
| CFT MIC                | A308029G         | pbp2x | R384G     | 0.12                     | 0.030           | 6.2×10 <sup>-5</sup>  |
| CFT MIC                | C308515G         | pbp2x | L546V     | 0.40                     | 0.041           | 2.8×10 <sup>-22</sup> |

a. Log<sub>2</sub> transformed MIC (μg ml<sup>-1</sup>) of the indicated beta-lactam antibiotic

b. Relative to reference TIGR4 genome. First letter is the reference allele

c. Increase in log<sub>2</sub>(MIC) associated with the alternative allele compared to the reference allele, after controlling for population structure

d. Standard error of the coefficient

**Supplementary Table 5.** Association between candidate variant and increased Cefuroxime (CFX) MIC

| Phenotype <sup>a</sup> | SNP <sup>b</sup> | Gene  | AA change | Coefficient <sup>c</sup> | SE <sup>d</sup> | p-value               |
|------------------------|------------------|-------|-----------|--------------------------|-----------------|-----------------------|
| CFX MIC                | T2008526G        | pbp1b | N214T     | -0.019                   | 0.018           | 0.29                  |
| CFX MIC                | A307891G         | pbp2x | T338A     | 0.054                    | 0.010           | 2.9×10 <sup>-7</sup>  |
| CFX MIC                | A308029G         | pbp2x | R384G     | 0.030                    | 0.0099          | 2.7×10 <sup>-3</sup>  |
| CFX MIC                | C308515G         | pbp2x | L546V     | 0.13                     | 0.014           | 2.1×10 <sup>-21</sup> |

a. Log<sub>2</sub> transformed MIC (μg ml<sup>-1</sup>) of the indicated beta-lactam antibiotic

b. Relative to reference TIGR4 genome. First letter is the reference allele

c. Increase in log<sub>2</sub>(MIC) associated with the alternative allele compared to the reference allele, after controlling for population structure

d. Standard error of the coefficient

**Supplementary Table 6.** Candidate variant effect size estimation adjusting for patient age, pneumococcal serotype and Penicillin (PEN) susceptibility

| <b>Variable</b>            | <b>Effects</b> | <b>Mixed-Effects logistic regression OR (95% CI) <sup>a</sup></b> | <b>p-value</b> |
|----------------------------|----------------|-------------------------------------------------------------------|----------------|
| <b><i>pbp1b641C</i></b>    | Fixed          |                                                                   |                |
| No                         |                | Reference                                                         | NA             |
| Yes                        |                | 2.46 (1.49 to 4.06)                                               | <0.001         |
| <b>Patient Age (years)</b> | Fixed          |                                                                   |                |
| <2                         |                | 1.98 (1.14 to 3.46)                                               | 0.016          |
| 2-4                        |                | 0.33 (0.08 to 1.41)                                               | 0.135          |
| 5-17                       |                | 1.37 (0.60 to 3.19)                                               | 0.458          |
| 18-64                      |                | Reference                                                         | NA             |
| >64                        |                | 0.46 (0.32 to 0.67)                                               | <0.001         |
| <b>PEN Susceptible</b>     | Fixed          |                                                                   |                |
| Yes                        |                | Reference                                                         |                |
| No                         |                | 1.50 (0.98 to 2.29)                                               | 0.063          |
| <b>Serotype</b>            | Random         |                                                                   |                |

a. Mixed-Effects logistic regression model with binary outcome (meningitis vs. non-meningitis) and the indicated explanatory variables.

**Supplementary Table 7.** Candidate variant effect size estimation adjusting for patient age, pneumococcal serotype and Amoxicillin (AMO) susceptibility

| <b>Variable</b>            | <b>Effects</b> | <b>Mixed-Effects logistic regression OR (95% CI)<sup>a</sup></b> | <b>p-value</b> |
|----------------------------|----------------|------------------------------------------------------------------|----------------|
| <b><i>pbp1b641C</i></b>    | Fixed          |                                                                  |                |
| No                         |                | Reference                                                        | NA             |
| Yes                        |                | 2.95 (1.83 to 4.75)                                              | <0.001         |
| <b>Patient Age (years)</b> | Fixed          |                                                                  |                |
| <2                         |                | 1.95 (1.11 to 3.40)                                              | 0.019          |
| 2-4                        |                | 0.35 (0.08 to 1.49)                                              | 0.154          |
| 5-17                       |                | 1.39 (0.61 to 3.18)                                              | 0.434          |
| 18-64                      |                | Reference                                                        | NA             |
| >64                        |                | 0.46 (0.32 to 0.67)                                              | <0.001         |
| <b>AMO Susceptible</b>     | Fixed          |                                                                  |                |
| Yes                        |                | Reference                                                        |                |
| No                         |                | 2.59 (1.31 to 5.10)                                              | 0.006          |
| <b>Serotype</b>            | Random         |                                                                  |                |

a. Mixed-Effects logistic regression model with binary outcome (meningitis vs. non-meningitis) and the indicated explanatory variables.

**Supplementary Table 8.** Candidate variant effect size estimation adjusting for patient age, pneumococcal serotype and Meropenem (MER) susceptibility

| <b>Variable</b>            | <b>Effects</b> | <b>Mixed-Effects logistic regression OR (95% CI)<sup>a</sup></b> | <b>p-value</b> |
|----------------------------|----------------|------------------------------------------------------------------|----------------|
| <b><i>pbp1b641C</i></b>    | Fixed          |                                                                  |                |
| No                         |                | Reference                                                        | NA             |
| Yes                        |                | 3.00 (1.85 to 4.87)                                              | <0.001         |
| <b>Patient Age (years)</b> | Fixed          |                                                                  |                |
| <2                         |                | 1.94 (1.11 to 3.39)                                              | 0.020          |
| 2-4                        |                | 0.35 (0.08 to 1.48)                                              | 0.153          |
| 5-17                       |                | 1.39 (0.61 to 3.19)                                              | 0.432          |
| 18-64                      |                | Reference                                                        | NA             |
| >64                        |                | 0.45 (0.31 to 0.66)                                              | <0.001         |
| <b>MER Susceptible</b>     | Fixed          |                                                                  |                |
| Yes                        |                | Reference                                                        |                |
| No                         |                | 2.20 (1.18 to 4.07)                                              | 0.013          |
| <b>Serotype</b>            | Random         |                                                                  |                |

a. Mixed-Effects logistic regression model with binary outcome (meningitis vs. non-meningitis) and the indicated explanatory variables.

**Supplementary Table 9.** Candidate variant effect size estimation adjusting for patient age, pneumococcal serotype and Cefotaxime (TAX) susceptibility

| <b>Variable</b>            | <b>Effects</b> | <b>Mixed-Effects logistic regression OR (95% CI) <sup>a</sup></b> | <b>p-value</b> |
|----------------------------|----------------|-------------------------------------------------------------------|----------------|
| <b><i>pbp1b641C</i></b>    | Fixed          |                                                                   |                |
| No                         |                | Reference                                                         | NA             |
| Yes                        |                | 2.96 (1.84 to 4.74)                                               | <0.001         |
| <b>Patient Age (years)</b> | Fixed          |                                                                   |                |
| <2                         |                | 1.95 (1.12 to 3.40)                                               | 0.019          |
| 2-4                        |                | 0.35 (0.08 to 1.52)                                               | 0.162          |
| 5-17                       |                | 1.39 (0.61 to 3.18)                                               | 0.432          |
| 18-64                      |                | Reference                                                         | NA             |
| >64                        |                | 0.46 (0.32 to 0.67)                                               | <0.001         |
| <b>TAX Susceptible</b>     | Fixed          |                                                                   |                |
| Yes                        |                | Reference                                                         |                |
| No                         |                | 2.10 (1.16 to 3.82)                                               | 0.015          |
| <b>Serotype</b>            | Random         |                                                                   |                |

a. Mixed-Effects logistic regression model with binary outcome (meningitis vs. non-meningitis) and the indicated explanatory variables.



**Supplementary Table 10.** Candidate variant effect size estimation adjusting for patient age, pneumococcal serotype and Ceftriaxone (CFT) susceptibility

| <b>Variable</b>            | <b>Effects</b> | <b>Mixed-Effects logistic regression OR (95% CI)<sup>a</sup></b> | <b>p-value</b> |
|----------------------------|----------------|------------------------------------------------------------------|----------------|
| <b><i>pbp1b641C</i></b>    | Fixed          |                                                                  |                |
| No                         |                | Reference                                                        | NA             |
| Yes                        |                | 2.99 (1.85 to 4.82)                                              | <0.001         |
| <b>Patient Age (years)</b> | Fixed          |                                                                  |                |
| <2                         |                | 1.96 (1.12 to 3.42)                                              | 0.018          |
| 2-4                        |                | 0.35 (0.08 to 1.49)                                              | 0.156          |
| 5-17                       |                | 1.40 (0.61 to 3.19)                                              | 0.428          |
| 18-64                      |                | Reference                                                        | NA             |
| >64                        |                | 0.46 (0.31 to 0.66)                                              | <0.001         |
| <b>CFT Susceptible</b>     | Fixed          |                                                                  |                |
| Yes                        |                |                                                                  |                |
| No                         |                | 2.16 (1.19 to 3.91)                                              | 0.011          |
| <b>Serotype</b>            | Random         |                                                                  |                |

a. Mixed-Effects logistic regression model with binary outcome (meningitis vs. non-meningitis) and the indicated explanatory variables.

**Supplementary Table 11.** Candidate variant effect size estimation adjusting for patient age, pneumococcal serotype and Cefuroxime (CFX) susceptibility

| <b>Variable</b>            | <b>Effects</b> | <b>Mixed-Effects logistic regression OR (95% CI)<sup>a</sup></b> | <b>p-value</b> |
|----------------------------|----------------|------------------------------------------------------------------|----------------|
| <b><i>pbp1b641C</i></b>    | Fixed          |                                                                  |                |
| No                         |                | Reference                                                        | NA             |
| Yes                        |                | 3.09 (1.90 to 5.03)                                              | <0.001         |
| <b>Patient Age (years)</b> | Fixed          |                                                                  |                |
| <2                         |                | 1.99 (1.14 to 3.47)                                              | 0.016          |
| 2-4                        |                | 0.35 (0.08 to 1.49)                                              | 0.155          |
| 5-17                       |                | 1.42 (0.62 to 3.27)                                              | 0.401          |
| 18-64                      |                | Reference                                                        | NA             |
| >64                        |                | 0.45 (0.31 to 0.65)                                              | <0.001         |
| <b>CFX Susceptible</b>     | Fixed          |                                                                  |                |
| Yes                        |                | Reference                                                        |                |
| No                         |                | 2.27 (1.36 to 3.08)                                              | 0.002          |
| <b>Serotype</b>            | Random         |                                                                  |                |

b. Mixed-Effects logistic regression model with binary outcome (meningitis vs. non-meningitis) and the indicated explanatory variables.

**Supplementary Table 12.** Candidate variant effect size estimation adjusting for patient age, pneumococcal serotype and Penicillin (PEN) minimum inhibitory concentration (MIC)

| <b>Variable</b>               | <b>Effects</b> | <b>Mixed-Effects logistic regression OR (95% CI) <sup>a</sup></b> | <b>p-value</b> |
|-------------------------------|----------------|-------------------------------------------------------------------|----------------|
| <b><i>pbp1b641C</i></b>       | Fixed          |                                                                   |                |
| No                            |                | Reference                                                         | NA             |
| Yes                           |                | 2.61 (1.58 to 4.51)                                               | <0.001         |
| <b>Patient Age (years)</b>    | Fixed          |                                                                   |                |
| <2                            |                | 1.95 (1.11 to 3.34)                                               | 0.019          |
| 2-4                           |                | 0.33 (0.08 to 1.41)                                               | 0.136          |
| 5-17                          |                | 1.39 (0.61 to 3.19)                                               | 0.434          |
| 18-64                         |                | Reference                                                         | NA             |
| >64                           |                | 0.45 (0.31 to 0.66)                                               | <0.001         |
| <b>Log2(PEN MIC)</b>          | Fixed          |                                                                   |                |
| Continuous<br>(range -5 to 3) |                | 1.13 (1.03 to 1.24)                                               | 0.009          |
| <b>Serotype</b>               | Random         |                                                                   |                |

a. Mixed-Effects logistic regression model with binary outcome (meningitis vs. non-meningitis) and the indicated explanatory variables.

**Supplementary Table 13.** Candidate variant effect size estimation adjusting for patient age, pneumococcal serotype and Amoxicillin (AMO) minimum inhibitory concentration (MIC)

| <b>Variable</b>               | <b>Effects</b> | <b>Mixed-Effects logistic regression OR (95% CI)<sup>a</sup></b> | <b>p-value</b> |
|-------------------------------|----------------|------------------------------------------------------------------|----------------|
| <b><i>pbp1b641C</i></b>       | Fixed          |                                                                  |                |
| No                            |                | Reference                                                        | NA             |
| Yes                           |                | 2.84 (1.72 to 4.69)                                              | <0.001         |
| <b>Patient Age (years)</b>    | Fixed          |                                                                  |                |
| <2                            |                | 1.91 (1.09 to 3.34)                                              | 0.023          |
| 2-4                           |                | 0.34 (0.08 to 1.45)                                              | 0.145          |
| 5-17                          |                | 1.39 (0.60 to 3.18)                                              | 0.441          |
| 18-64                         |                | Reference                                                        | NA             |
| >64                           |                | 0.45 (0.31 to 0.66)                                              | <0.001         |
| <b>Log2(AMO MIC)</b>          | Fixed          |                                                                  |                |
| Continuous<br>(range -5 to 3) |                | 1.13 (1.03 to 1.24)                                              | 0.006          |
| <b>Serotype</b>               | Random         |                                                                  |                |

a. Mixed-Effects logistic regression model with binary outcome (meningitis vs. non-meningitis) and the indicated explanatory variables.

**Supplementary Table 14.** Candidate variant effect size estimation adjusting for patient age, pneumococcal serotype and Meropenem (MER) minimum inhibitory concentration (MIC)

| <b>Variable</b>               | <b>Effects</b> | <b>Mixed-Effects logistic regression OR (95% CI)<sup>a</sup></b> | <b>p-value</b> |
|-------------------------------|----------------|------------------------------------------------------------------|----------------|
| <b><i>pbp1b641C</i></b>       | Fixed          |                                                                  |                |
| No                            |                | Reference                                                        | NA             |
| Yes                           |                | 3.05 (1.88 to 4.97)                                              | <0.001         |
| <b>Patient Age (years)</b>    | Fixed          |                                                                  |                |
| <2                            |                | 1.93 (1.10 to 3.37)                                              | 0.021          |
| 2-4                           |                | 0.35 (0.08 to 1.49)                                              | 0.154          |
| 5-17                          |                | 1.41 (0.62 to 3.32)                                              | 0.418          |
| 18-64                         |                | Reference                                                        | NA             |
| >64                           |                | 0.45 (0.31 to 0.66)                                              | <0.001         |
| <b>Log2(MER MIC)</b>          | Fixed          |                                                                  |                |
| Continuous<br>(range -4 to 0) |                | 1.27 (1.07 to 1.50)                                              | 0.006          |
| <b>Serotype</b>               | Random         |                                                                  |                |

b. Mixed-Effects logistic regression model with binary outcome (meningitis vs. non-meningitis) and the indicated explanatory variables.

**Supplementary Table 15.** Candidate variant effect size estimation adjusting for patient age, pneumococcal serotype and Cefotaxime (TAX) minimum inhibitory concentration (MIC)

| <b>Variable</b>               | <b>Effects</b> | <b>Mixed-Effects logistic regression OR (95% CI)<sup>a</sup></b> | <b>p-value</b> |
|-------------------------------|----------------|------------------------------------------------------------------|----------------|
| <b><i>pbp1b641C</i></b>       | Fixed          |                                                                  |                |
| No                            |                | Reference                                                        | NA             |
| Yes                           |                | 2.83 (1.74 to 4.61)                                              | <0.001         |
| <b>Patient Age (years)</b>    | Fixed          |                                                                  |                |
| <2                            |                | 1.95 (1.12 to 3.41)                                              | 0.019          |
| 2-4                           |                | 0.35 (0.08 to 1.50)                                              | 0.157          |
| 5-17                          |                | 1.39 (0.61 to 3.20)                                              | 0.433          |
| 18-64                         |                | Reference                                                        | NA             |
| >64                           |                | 0.45 (0.31 to 0.66)                                              | <0.001         |
| <b>Log2(TAX MIC)</b>          | Fixed          |                                                                  |                |
| Continuous<br>(range -4 to 3) |                | 1.19 (1.05 to 1.36)                                              | 0.006          |
| <b>Serotype</b>               | Random         |                                                                  |                |

a. Mixed-Effects logistic regression model with binary outcome (meningitis vs. non-meningitis) and the indicated explanatory variables.

**Supplementary Table 16.** Candidate variant effect size estimation adjusting for patient age, pneumococcal serotype and Cefotriaxone (CFT) minimum inhibitory concentration (MIC)

| <b>Variable</b>               | <b>Effects</b> | <b>Mixed-Effects logistic regression OR (95% CI)<sup>a</sup></b> | <b>p-value</b> |
|-------------------------------|----------------|------------------------------------------------------------------|----------------|
| <b><i>pbp1b641C</i></b>       | Fixed          |                                                                  |                |
| No                            |                | Reference                                                        | NA             |
| Yes                           |                | 2.71 (1.66 to 4.43)                                              | <0.001         |
| <b>Patient Age (years)</b>    | Fixed          |                                                                  |                |
| <2                            |                | 1.96 (1.12 to 3.42)                                              | 0.019          |
| 2-4                           |                | 0.34 (0.08 to 1.46)                                              | 0.157          |
| 5-17                          |                | 1.39 (0.61 to 3.19)                                              | 0.433          |
| 18-64                         |                | Reference                                                        | NA             |
| >64                           |                | 0.45 (0.31 to 0.66)                                              | <0.001         |
| <b>Log2(CFT MIC)</b>          | Fixed          |                                                                  |                |
| Continuous<br>(range -5 to 4) |                | 1.14 (1.03 to 1.26)                                              | 0.014          |
| <b>Serotype</b>               | Random         |                                                                  |                |

a. Mixed-Effects logistic regression model with binary outcome (meningitis vs. non-meningitis) and the indicated explanatory variables.

**Supplementary Table 17.** Candidate variant effect size estimation adjusting for patient age, pneumococcal serotype and Cefuroxime (CFX) minimum inhibitory concentration (MIC)

| <b>Variable</b>               | <b>Effects</b> | <b>Mixed-Effects logistic regression OR (95% CI)<sup>a</sup></b> | <b>p-value</b> |
|-------------------------------|----------------|------------------------------------------------------------------|----------------|
| <b><i>pbp1b641C</i></b>       | Fixed          |                                                                  |                |
| No                            |                | Reference                                                        | NA             |
| Yes                           |                | 3.10 (1.66 to 4.43)                                              | <0.001         |
| <b>Patient Age (years)</b>    | Fixed          |                                                                  |                |
| <2                            |                | 1.97 (1.13 to 3.45)                                              | 0.019          |
| 2-4                           |                | 0.35 (0.08 to 1.47)                                              | 0.157          |
| 5-17                          |                | 1.42 (0.62 to 3.25)                                              | 0.433          |
| 18-64                         |                | Reference                                                        | NA             |
| >64                           |                | 0.45 (0.31 to 0.65)                                              | <0.001         |
| <b>Log2(CFX MIC)</b>          | Fixed          |                                                                  |                |
| Continuous<br>(range -1 to 1) |                | 1.55 (1.17 to 2.04)                                              | 0.002          |
| <b>Serotype</b>               | Random         |                                                                  |                |

a. Mixed-Effects logistic regression model with binary outcome (meningitis vs. non-meningitis) and the indicated explanatory variables.



**Supplementary Table 18.** Top five variants associated with meningitis identified by fitting linear mixed-effects model using the GEMMA software, exploratory sample

| <b>Rank</b> | <b>Type</b> | <b>Gene Affected</b>                             | <b>p-value</b>        |
|-------------|-------------|--------------------------------------------------|-----------------------|
| 1           | AAV         | Penicillin-binding protein 1b ( <i>pbp1b</i> )   | $3.85 \times 10^{-6}$ |
| 2           | AAV         | penicillin-binding protein 1A ( <i>pbp1A</i> )   | $1.81 \times 10^{-4}$ |
| 3           | AAV         | ABC transporter, ATP-binding protein (SP670_913) | $2.18 \times 10^{-4}$ |
| 4           | AAV         | Glycosyltransferase (SP670_913)                  | $2.20 \times 10^{-4}$ |
| 5           | AAV         | penicillin-binding protein 1A ( <i>pbp1A</i> )   | $3.42 \times 10^{-4}$ |

**Supplementary Table 19.** Top five variants associated with meningitis identified by fitting linear mixed-effects model using the GEMMA software, confirmatory cohort

| <b>Rank</b> | <b>Type</b> | <b>Gene Affected</b>                           | <b>p-value</b>        |
|-------------|-------------|------------------------------------------------|-----------------------|
| 1           | AAV         | Penicillin-binding protein 1b ( <i>pbp1b</i> ) | $6.44 \times 10^{-6}$ |
| 2           | GAP         | primase 1 family protein (PAR136_1574)         | $5.12 \times 10^{-6}$ |
| 3           | AAV         | conserved hypothetical protein(SP670_1752)     | $1.29 \times 10^{-5}$ |
| 4           | AAV         | mannose-6-phosphate isomerase (MYY_0772)       | $2.13 \times 10^{-5}$ |
| 5           | GAP         | hypothetical protein (SPAR94_1544)             | $2.41 \times 10^{-4}$ |

**Supplementary Table 20.** Comparison of the exploratory sample isolates with the overall ABCs data

|                            | <b>Exploratory sample<br/>(n=2054)</b> | <b>ABCs Isolates <sup>a</sup><br/>(n=56771)</b> | <b>Overall ABCs <sup>b</sup><br/>(n=64126)</b> |
|----------------------------|----------------------------------------|-------------------------------------------------|------------------------------------------------|
| <b>Meningitis</b>          |                                        |                                                 |                                                |
| No                         | 1915 (93%) <sup>c</sup>                | 53348 (94%)                                     | 60341 (94%)                                    |
| Yes                        | 139 (7%)                               | 3423 (6%)                                       | 3785 (6%)                                      |
| <b>Patient age (years)</b> |                                        |                                                 |                                                |
| <2                         | 848 (41%)                              | 5394 (10%)                                      | 6265 (10%)                                     |
| 2-4                        | 556 (27%)                              | 2449 (4%)                                       | 2844 (4%)                                      |
| 5-17                       | 125 (6%)                               | 1940 (3%)                                       | 2185 (3%)                                      |
| 18-64                      | 310 (15%)                              | 28446 (50%)                                     | 31945 (50%)                                    |
| >64                        | 215 (10%)                              | 18536 (33%)                                     | 20879 (33%)                                    |
| Unknown                    | 0 (0%)                                 | 6 (0%)                                          | 8 (0%)                                         |
| <b>Serotype Group</b>      |                                        |                                                 |                                                |
| Non-PCV13 <sup>d</sup>     | 835 (41%)                              | 25978 (46%)                                     | NA                                             |
| PCV7 <sup>e</sup>          | 565 (27%)                              | 13699 (24%)                                     | NA                                             |
| PCV13 minus PCV7           | 654 (32%)                              | 17019 (30%)                                     | NA                                             |
| Unknown                    | 0 (0%)                                 | 75 (0%)                                         | NA                                             |
| <b>PEN MIC (µg/mL)</b>     |                                        |                                                 |                                                |
| ≤0.06                      | 1373 (67%)                             | 43044 (76%)                                     | NA                                             |
| ≥0.12                      | 681 (33%)                              | 13710 (24%)                                     | NA                                             |
| Unknown                    | 0 (0%)                                 | 17 (0%)                                         | NA                                             |

a. ABCs data 1998-2014 where isolate available with MIC results

b. All ABCs data 1998-2014 (including cases without an isolate available)

c. Data are number (%). Some percentages do not total 100 because of rounding.

d. PCV13 serotypes are 1, 3, 4, 5, 6A, 6B, 7F, 9V, 14, 18C, 19A, 19F, and 23F.

e. PCV7 serotypes are 4, 6B, 9V, 14, 18C, 19F, and 23F.

**Supplementary Table 21.** Interpretive Standard for  $\beta$ -lactam antibiotics

| Antibiotics       | Breakpoint MIC ( $\mu\text{g/mL}$ ) |                      |
|-------------------|-------------------------------------|----------------------|
|                   | Susceptible (S)                     | Non-Susceptible (NS) |
| Penicillin (PEN)  | $\leq 0.06$                         | $\geq 0.12$          |
| Amoxicillin (AMO) | $\leq 2$                            | $\geq 4$             |
| Meropenem (MER)   | $\leq 0.25$                         | $\geq 0.5$           |
| Cefotaxime (TAX)  | $\leq 0.5$                          | $\geq 1$             |
| Ceftriaxone (CFT) | $\leq 0.5$                          | $\geq 1$             |
| Cefuroxime (CFX)  | $\leq 0.5$                          | $\geq 1$             |

**Supplementary Table 22.** List of the 20 *S. pneumoniae* complete genome sequences

| <b>Strain Name</b> | <b>Accession Number</b> | <b>URL</b>                                                                                                 | <b>CDS prefix</b> |
|--------------------|-------------------------|------------------------------------------------------------------------------------------------------------|-------------------|
| TIGR4              | NC_003028               | <a href="https://www.ncbi.nlm.nih.gov/nucore/NC_003028">https://www.ncbi.nlm.nih.gov/nucore/NC_003028</a>  | SP                |
| R6                 | NC_003098               | <a href="https://www.ncbi.nlm.nih.gov/nucore/NC_003098">https://www.ncbi.nlm.nih.gov/nucore/NC_003098</a>  | spr               |
| D39                | NC_008533               | <a href="https://www.ncbi.nlm.nih.gov/nucore/NC_008533">https://www.ncbi.nlm.nih.gov/nucore/NC_008533</a>  | SPD               |
| Hungary19A         | NC_010380               | <a href="https://www.ncbi.nlm.nih.gov/nucore/NC_010380">https://www.ncbi.nlm.nih.gov/nucore/NC_010380</a>  | SPH               |
| CGSP14             | NC_010582               | <a href="https://www.ncbi.nlm.nih.gov/nucore/NC_010582">https://www.ncbi.nlm.nih.gov/nucore/NC_010582</a>  | SPCG              |
| G54                | NC_011072               | <a href="https://www.ncbi.nlm.nih.gov/nucore/NC_011072">https://www.ncbi.nlm.nih.gov/nucore/NC_011072</a>  | SPG               |
| ATCC_700669        | NC_011900               | <a href="https://www.ncbi.nlm.nih.gov/nucore/NC_011900">https://www.ncbi.nlm.nih.gov/nucore/NC_011900</a>  | SPN23F            |
| JJA                | NC_012466               | <a href="https://www.ncbi.nlm.nih.gov/nucore/NC_012466">https://www.ncbi.nlm.nih.gov/nucore/NC_012466</a>  | SPJ               |
| P1031              | NC_012467               | <a href="https://www.ncbi.nlm.nih.gov/nucore/NC_012467">https://www.ncbi.nlm.nih.gov/nucore/NC_012467</a>  | SPP               |
| 70585              | NC_012468               | <a href="https://www.ncbi.nlm.nih.gov/nucore/NC_012468">https://www.ncbi.nlm.nih.gov/nucore/NC_012468</a>  | SP70585           |
| Taiwan19F_14       | NC_012469               | <a href="https://www.ncbi.nlm.nih.gov/nucore/NC_012469">https://www.ncbi.nlm.nih.gov/nucore/NC_012469</a>  | SPT               |
| TCH8431_19A        | NC_014251               | <a href="https://www.ncbi.nlm.nih.gov/nucore/NC_014251">https://www.ncbi.nlm.nih.gov/nucore/NC_014251</a>  | HMPREF0837        |
| AP200              | NC_014494               | <a href="https://www.ncbi.nlm.nih.gov/nucore/NC_014494">https://www.ncbi.nlm.nih.gov/nucore/NC_014494</a>  | SPAP              |
| 670_6B             | NC_014498]              | <a href="https://www.ncbi.nlm.nih.gov/nucore/NC_014498">https://www.ncbi.nlm.nih.gov/nucore/NC_014498]</a> | SP670             |
| INV104             | NC_017591               | <a href="https://www.ncbi.nlm.nih.gov/nucore/NC_017591">https://www.ncbi.nlm.nih.gov/nucore/NC_017591</a>  | INV104            |
| OXC141             | NC_017592               | <a href="https://www.ncbi.nlm.nih.gov/nucore/NC_017592">https://www.ncbi.nlm.nih.gov/nucore/NC_017592</a>  | SPNOXC            |
| INV200             | NC_017593               | <a href="https://www.ncbi.nlm.nih.gov/nucore/NC_017593">https://www.ncbi.nlm.nih.gov/nucore/NC_017593</a>  | SPNINV200         |
| ST556              | NC_017769               | <a href="https://www.ncbi.nlm.nih.gov/nucore/NC_017769">https://www.ncbi.nlm.nih.gov/nucore/NC_017769</a>  | MYY               |
| gamPNI0373         | NC_018630               | <a href="https://www.ncbi.nlm.nih.gov/nucore/NC_018630">https://www.ncbi.nlm.nih.gov/nucore/NC_018630</a>  | SPNA45            |
| SPNA54             | NC_018594               | <a href="https://www.ncbi.nlm.nih.gov/nucore/NC_018594">https://www.ncbi.nlm.nih.gov/nucore/NC_018594</a>  | HMPREF1038        |

**Supplementary Table 23.** Allele sequences used in SRST2 for *pbp1b641C* sequence typing

| Allele           | Sequence for typing                                                                                                                                                                                                                                                                                                    |
|------------------|------------------------------------------------------------------------------------------------------------------------------------------------------------------------------------------------------------------------------------------------------------------------------------------------------------------------|
| <i>pbp1b641A</i> | ATTCGTGCGACCTTGGGGAAATTTGTAGGTTTGGGTTCTCTAGTGGGGGTTCAACCTTGACCCAGCAACTAATTA<br>AACAGCAGGTGGTTGGGGATGCGCCGACCTTGGCTCGTAAGGCGGCAGAGATTGTGGATGCTCTTGCCTTGGAA<br>CGCGCCATGAATAAAGATGAGATTTTAACGACCTATCTCAATGTGGCTCCCTTTGGCCGAAATAATAAGGGACAGA<br>ATATTGCAGGGGCTCGGCAAGCAGCTGAGGGAATTTTCGGTGTAGATGCCAGTCAGTTGACTGTTCTCAAGCA |
| <i>pbp1b641C</i> | ATTCGTGCGACCTTGGGGAAATTTGTAGGTTTGGGTTCTCTAGTGGGGGTTCAACCTTGACCCAGCAACTAATTA<br>AACAGCAGGTGGTTGGGGATGCGCCGACCTTGGCTCGTAAGGCGGCAGAGATTGTGGATGCTCTTGCCTTGGAA<br>CGCGCCATGACTAAAGATGAGATTTTAACGACCTATCTCAATGTGGCTCCCTTTGGCCGAAATAATAAGGGACAGA<br>ATATTGCAGGGGCTCGGCAAGCAGCTGAGGGAATTTTCGGTGTAGATGCCAGTCAGTTGACTGTTCTCAAGCA |

**Supplementary Table 24.** Laboratory strains and PCR primers used in this study

| Strain or Primer | Description                                                                              | Source or reference                                            |
|------------------|------------------------------------------------------------------------------------------|----------------------------------------------------------------|
| <b>Strains</b>   |                                                                                          |                                                                |
| R6               | A streptomycin-resistant R6 strain                                                       | J Bacteriol. 2006<br>Jul;188(13):4996-<br>5001.(PMID:16788209) |
| SPNYL001         | A TIGR4 strain derivative with the <i>cps</i> locus replaced by the Sweet-Janus cassette | PLoS One. 2014 Jun<br>24;9(6):e100510.(PMID:<br>24959661)      |
| R6_SJ            | R6 but <i>pbp1b::sacB-kan-rpsL</i> <sup>+</sup>                                          | This study                                                     |
| R6_641C          | R6 but <i>pbp1b::pbp1bA641C</i>                                                          | This study                                                     |
| <b>Primers</b>   |                                                                                          |                                                                |
| YL8001           | GGCAAATCAAGATACTCCAAATATC                                                                | This study                                                     |
| YL8002           | CGATCCTTAAGATTCAGCAAGCTTCCCC                                                             | This study                                                     |
| YL8003           | TTGCTGAATCTTAAGGATCGATCCGTTTG                                                            | This study                                                     |
| YL8004           | AGCAAAAACATTATGCTTTTGGACGTTTAG                                                           | This study                                                     |
| YL8005           | AAAAGCATAATGTTTTTGGCTGGAAAAATTCC                                                         | This study                                                     |
| YL8006           | CTTCACGAGCCAAGACTTTTTG                                                                   | This study                                                     |
| YL8007           | GCCAAAATCATCCCCACCC                                                                      | This study                                                     |
| YL8008           | CAATCTCATCAAGTGACAAGAAAGT                                                                | This study                                                     |
| YL8009           | ATCTTTAGTCATGGCGCGTTCCAAG                                                                | This study                                                     |
| YL8010           | GCCATGACTAAAGATGAGATTTTAACG                                                              | This study                                                     |

**Supplementary Table 25.** Minimum inhibitory concentration (MIC) for the R6 and R6\_641C strains measured by broth microdilution method

| Antibiotic      | MIC ( $\mu\text{g ml}^{-1}$ ) |             |
|-----------------|-------------------------------|-------------|
|                 | R6                            | R6_641C     |
| Ampicillin      | =0.06                         | =0.06       |
| Cefoxitin       | =4                            | =4          |
| Ceftaroline     | <=0.12                        | <=0.12      |
| Ceftizoxime     | <=0.12                        | <=0.12      |
| Ceftriaxone     | <=0.06                        | <=0.06      |
| Chloramphenicol | <=2                           | <=2         |
| Clindamycin     | <=0.06                        | <=0.06      |
| Daptomycin      | <=0.5                         | <=0.5       |
| Doxycycline     | =0.5                          | =0.25       |
| Erythromycin    | <=0.06                        | <=0.06      |
| Levofloxacin    | <=0.5                         | =1          |
| Linezolid       | <=1                           | <=1         |
| Meropenem       | <=0.06                        | <=0.06      |
| Penicillin      | <=0.03                        | <=0.03      |
| Rifampin        | <=0.5                         | <=0.5       |
| Synercid        | <=0.5                         | <=0.5       |
| Trimeth-sulfa   | <=0.12/2.38                   | <=0.12/2.38 |
| Vancomycin      | <=0.25                        | <=0.25      |
