# Supplementary material for: Genome-wide association analyses of invasive pneumococcal isolates identify a missense bacterial mutation associated with meningitis
Source: PubMed Central journal article supplement (PMC6331587; doi:10.1038/s41467-018-07997-y), 2019-01-14
Supplement: 41467_2018_7997_MOESM2_ESM.pdf [file 41467_2018_7997_MOESM2_ESM.pdf]

## **Description of Additional Supplementary Files**

File Name: Supplementary Data 1

Description: List of 2054 exploratory sample isolates.

File Name: Supplementary Data 2

Description: List of 2518 confirmatory cohort isolates.
